# Supplementary material for: Mesomorphic behavior induced by stacking interactions between poly(2-vinyl pyridine) and palladium pincer surfactants in the solid state
Source: Royal Society of Chemistry journal article supplement (doi:10.1039/c2sm25640a), 2012-01-01
Supplement: c2sm25640a.pdf [file c2sm25640a.pdf]

# Supramolecular Comb Polymer Structure and Unique Mesomorphic Behavior Induced by Stacking Interactions Between Poly(2-Vinyl Pyridine) and Palladium Pincer Surfactants in the Solid State

*Inbal Davidi,<sup>†</sup> Artyom Semionov,<sup>‡</sup> David Eisenberg,<sup>†</sup> Gil Goobes,<sup>‡</sup> and Roy Shenhar<sup>†,\*</sup>*

<sup>†</sup> The Institute of Chemistry, the Center for Nanoscience and Nanotechnology, and the Lise Meitner-Minerva Center for Computational Quantum Chemistry, The Hebrew University of Jerusalem, Jerusalem 91904, Israel; <sup>‡</sup>Department of Chemistry, Bar-Ilan University, Ramat Gan 52900, Israel.

E-mail: roys@chem.ch.huji.ac.il

## Synthetic details

The Pd-SCS surfactant was synthesized according to modified literature procedures.<sup>1,2,3</sup> Figure S1 shows the entire synthetic scheme.

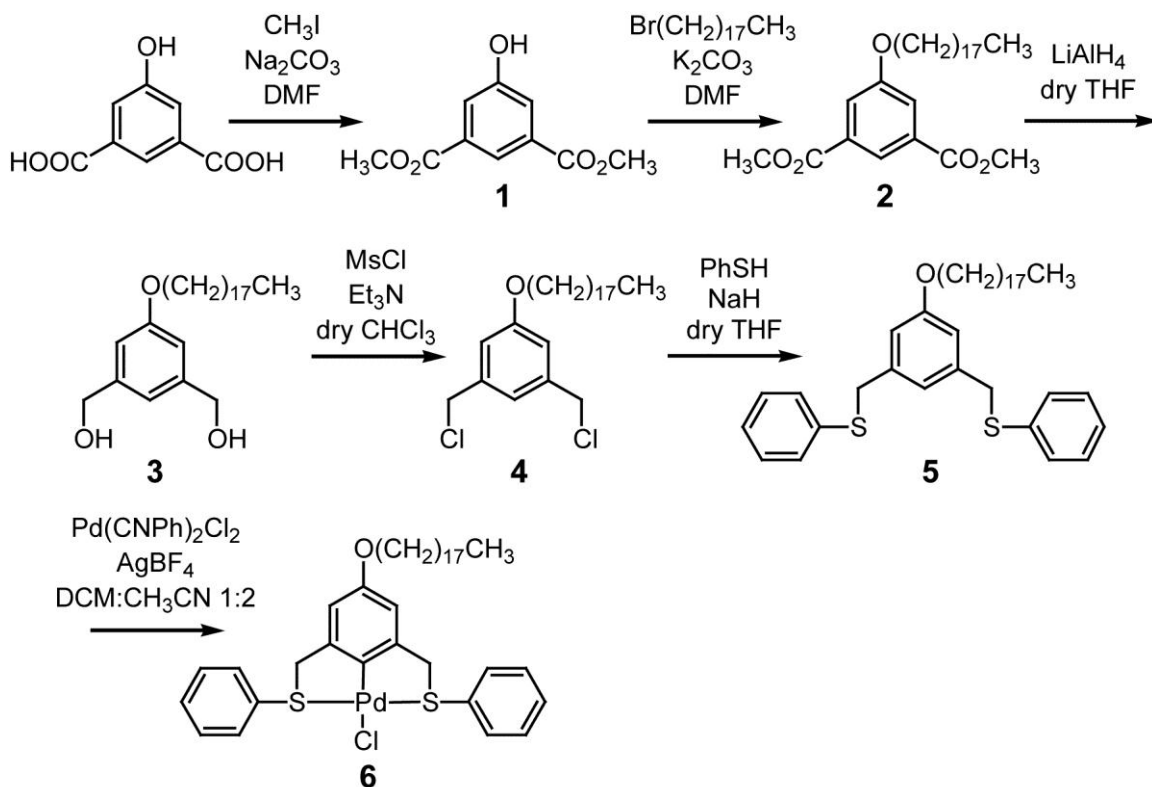

**Figure S1.** Pd-SCS synthesis.

**Dimethyl 5-hydroxyisophthalate (1).** To 2-hydroxyisophthalic acid dissolved in  $\text{DMF}$ ,  $\text{Na}_2\text{CO}_3$  (1 eq) was added slowly. After few minutes of mixing, methyl iodide (2 eq) was added. The mixture was stirred for 24 h at 40-50 °C, after which the solution was allowed to cool down to room temperature. The product was diluted in water, extracted with ethyl acetate, dried over  $\text{Na}_2\text{SO}_4$  and filtered. Evaporation of the solution provided **1** as a white solid (77% yield).  $^1\text{H-NMR}$  (400 MHz,  $\delta_{\text{H}}$  ppm,  $\text{CDCl}_3$ ) 8.26 (1 H, s, Ph), 7.76 (2 H, s, Ph), 3.95 (6 H, s,  $\text{CH}_3$ ).

**Dimethyl 5-(octadecyloxy)isophthalate (2).** Compound **1**,  $K_2CO_3$  (2.5 eq) and 11-bromooctadecane (1 eq) were dissolved in  $CH_3CN$ . The mixture was heated to reflux for 24 h, after which the solvent was evaporated and the product was re-dissolved in  $CH_2Cl_2$  and washed with water. The organic layer was washed with 1M HCl solution, dried over  $Na_2SO_4$ , filtered and evaporated, resulting in white solid (98% yield).  $^1H$ -NMR (400 MHz,  $\delta_H$  ppm,  $CDCl_3$ ) 8.26 (1 H, s, Ph), 7.74 (2 H, s, Ph), 4.03 (2 H, t,  $J=6.8$ ,  $OCH_2$ ), 3.94 (6 H, s,  $CO_2CH_3$ ), 1.80 (2 H, m,  $OCH_2CH_2$ ), 1.47 (2 H, m,  $CH_2$ ), 1.25-1.40 (28 H, br s,  $CH_2$ ), 0.88 (3 H, t,  $J=6.8$ ,  $CH_2CH_3$ ).

**(5-(Octadecyloxy)-1,3-phenylene)dimethanol (3).**  $LiAlH_4$  (2 eq) was suspended in dry THF to create 1M solution to which **2** (1 eq), dissolved in dry THF, was added dropwise under nitrogen atmosphere. The reaction was heated to 40 °C for 24 h, cooled to room temperature, HCl solution (1 M) was added and the solvent was evaporated. The product was extracted in a soxhlet with a 1:1 v/v mixture of  $CH_2Cl_2$ :THF. Recrystallization from EtOH resulted in white solid (83% yield).  $^1H$ -NMR (400 MHz,  $\delta_H$  ppm,  $CDCl_3$ ) 6.93 (1 H, s, Ph), 6.84 (2 H, s, Ph), 4.66 (4 H, s,  $CH_2OH$ ), 3.98 (2 H, t,  $J=6.4$ ,  $OCH_2$ ), 1.76 (2 H, m,  $OCH_2CH_2$ ), 1.47 (2 H, m,  $CH_2$ ), 1.28-1.40 (28 H, br s,  $CH_2$ ), 0.88 (3 H, t,  $J=6.8$ ,  $CH_3$ ).

**1,3-Bis(chloromethyl)-5-(octadecyloxy)benzene (4).** Compound **3** was dissolved in dry  $CHCl_3$  under nitrogen atmosphere, after which triethyl amine (3 eq) and mesyl chloride (MsCl, 3 eq) were added. The reaction was refluxed overnight. After cooling, the solvent was evaporated and the product was purified by column chromatography ( $SiO_2$ , with 1:2 ethyl acetate:hexane as eluent). Recrystallization from EtOH resulted in white solid (80% yield).  $^1H$ -NMR (400 MHz,  $\delta_H$  ppm,  $CDCl_3$ ) 6.97 (1 H, s, Ph), 6.88 (2 H, s, Ph), 4.54 (4 H, s,  $CH_2Cl$ ), 3.97 (2 H, t,  $J=6.4$ ,  $OCH_2$ ), 1.76 (2 H, m,  $OCH_2CH_2$ ), 1.45 (2 H, m,  $CH_2$ ), 1.28-1.40 (28 H, br s,  $CH_2$ ), 0.88 (3 H, t,  $J=6.8$ ,  $CH_3$ ).

**(5-(Octadecyloxy)-1,3-phenylene)bis(methylene)bis(phenylsulfane) (5).** Thiophenol (4 eq) was added to a stirred suspension of NaH (8 eq) in dry THF. The mixture was stirred for 1-1.5 hr to allow the formation of sodium thiophenolate. A solution of compound **4** in dry THF was added dropwise and the mixture was heated to 50 °C under nitrogen atmosphere overnight. The solvent was evaporated and the reaction mixture was re-dissolved in CH<sub>2</sub>Cl<sub>2</sub>. Excess NaH was neutralized with HCl solution (1 M). The organic layer was extracted with saturated solution of NaHCO<sub>3</sub> and brine, dried over Na<sub>2</sub>SO<sub>4</sub>, filtered and the solvent was evaporated. The product was purified by column chromatograph (SiO<sub>2</sub>, 1:10 ethyl acetate:hexane as eluent) and then recrystallized from hexane or EtOH to give a white solid (75% yield). <sup>1</sup>H-NMR (400 MHz, δ<sub>H</sub> ppm, CDCl<sub>3</sub>) 7.22-7.25 (10 H, m, PhS), 6.81 (1 H, s, Ph), 6.70 (2 H, s, Ph), 4.03 (4 H, s, CH<sub>2</sub>S), 3.84 (2 H, t, *J*=6.4, OCH<sub>2</sub>), 1.71 (2 H, m, OCH<sub>2</sub>CH<sub>2</sub>), 1.41 (2 H, m, CH<sub>2</sub>), 1.25-1.30 (28 H, br s, CH<sub>2</sub>), 0.88 (3 H, t, *J*=6.8, CH<sub>3</sub>).

**(4-(Octadecyloxy)-2,6-bis(phenylthiomethyl)phenyl)palladium(II) chloride (6).** The synthesis was performed according to the literature.<sup>Error! Bookmark not defined.</sup> The yellow product was purified by column chromatography (SiO<sub>2</sub>, 200:3 CH<sub>2</sub>Cl<sub>2</sub>:MeOH as eluent) (72% yield). <sup>1</sup>H-NMR (400 MHz, δ<sub>H</sub> ppm, CDCl<sub>3</sub>) 7.81 (4 H, m, PhS), 7.36 (6 H, m, PhS), 6.60 (2 H, s, Ph), 4.55 (4 H, br s, CH<sub>2</sub>S), 3.86 (2 H, t, *J*=6.4, OCH<sub>2</sub>), 1.73 (2 H, m, OCH<sub>2</sub>CH<sub>2</sub>), 1.41 (2 H, m, CH<sub>2</sub>), 1.25-1.30 (28 H, br s, CH<sub>2</sub>), 0.88 (3 H, t, *J*=7.2, CH<sub>3</sub>).

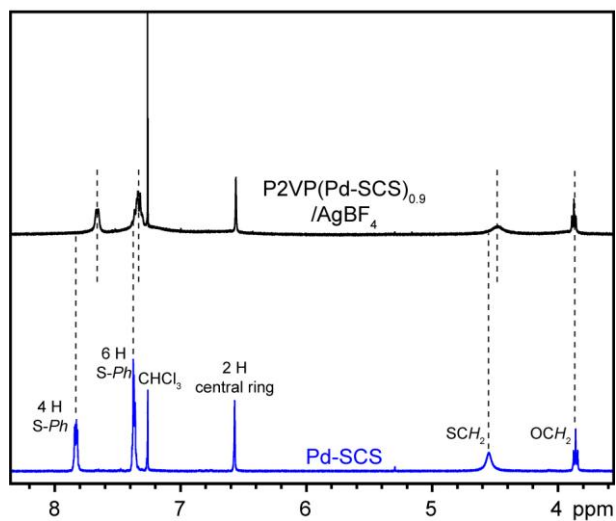

**Figure S2.** Low field portion of <sup>1</sup>H-NMR in CDCl<sub>3</sub> of pure Pd-SCS (blue) and P2VP(Pd-SCS)<sub>0.9</sub>/AgBF<sub>4</sub> (black). Spectra are offset for clarity.

**Table S1.** ss-<sup>13</sup>C-NMR assignment of Pd-SCS and P2VP based on DFT calculations.

| <b>Pd-SCS</b>     |                              |                               |                    | <b>P2VP</b>       |                              |                               |
|-------------------|------------------------------|-------------------------------|--------------------|-------------------|------------------------------|-------------------------------|
| <b>assignment</b> | <b>δ<sub>exp</sub> (ppm)</b> | <b>δ<sub>calc</sub> (ppm)</b> |                    | <b>assignment</b> | <b>δ<sub>exp</sub> (ppm)</b> | <b>δ<sub>calc</sub> (ppm)</b> |
| C19               | 157                          | 156.2                         |                    | C3                | 165                          | 168.6                         |
| C20,C24           | 111                          | 110.6                         | 106.1 <sup>a</sup> | C7                | 150                          | 149.2                         |
|                   |                              | 101.6                         |                    | C5                | 135                          | 133.6                         |
| C21,C23           | 152                          | 147.9                         | 146.9 <sup>a</sup> | C4                | 122                          | 118.4                         |
|                   |                              | 145.9                         |                    | C6                |                              | 119.7                         |
| C22               | 107                          | 179.7                         |                    | C2                | 40-45                        | 51.3                          |
| C25               | 54                           | 63.7                          | 59.3 <sup>a</sup>  |                   |                              |                               |
|                   |                              | 55.0                          |                    |                   |                              |                               |
| C26               |                              | 139.1                         | 129.6 <sup>a</sup> |                   |                              |                               |
|                   |                              | 138.6                         |                    |                   |                              |                               |
| C28,C30           | 130                          | 126.8                         |                    |                   |                              |                               |
|                   |                              | 128.4                         |                    |                   |                              |                               |
|                   |                              | 126.6                         |                    |                   |                              |                               |
|                   |                              | 127.5                         |                    |                   |                              |                               |
|                   |                              | 119.8                         |                    |                   |                              |                               |
| C27,C31           |                              | 131.5                         |                    |                   |                              |                               |
|                   |                              | 128.5                         |                    |                   |                              |                               |
|                   |                              | 136.2                         |                    |                   |                              |                               |
| C29               |                              | 124.8                         |                    |                   |                              |                               |
|                   |                              | 127.3                         |                    |                   |                              |                               |
| C18               | 68                           | 56.6                          |                    |                   |                              |                               |
| C4-C17            | 30-40                        |                               |                    |                   |                              |                               |
| C16               |                              |                               |                    |                   |                              |                               |
| C3                | 25                           |                               |                    |                   |                              |                               |
| C2                | 23                           |                               |                    |                   |                              |                               |
| C1                | 15                           |                               |                    |                   |                              |                               |

<sup>a</sup> Average calculated values.

## References

- (1) Guo, W.; Li, J. F.; Fan, N. J.; Wu, W. W.; Zhou, P. W.; Xia, C. Z., *Synth. Commun.* **2005**, *35*, 145-152.
- (2) Pollino, J. M.; Stubbs, L. P.; Weck, M., *Macromolecules* **2003**, *36*, 2230-2234.
- (3) Huck, W. T. S.; van Veggel, F. C. J. M.; Reinhoudt, D. N., *J. Mater. Chem.* **1997**, *7*, 1213-1219.
